# Supplementary material for: The process and value of reprogramming a legacy global hydrological model
Source: Copernicus journal article supplement (doi:10.5194/gmd-18-5635-2025), 2025-09-04
Supplement: Supplementary file 1 [file gmd-18-5635-2025-supplement.zip]

## Sheet: Sheet1
		PROGRESS CHART
Userstories	User stories
		Actual hours (cumulative)	144	336	536	712	872	1032	1176	1280	1384	1512	1624	1768	1888	1968	2144	2208	2304	2464	2552	2640	2720	2800	2816	2912	3072	3208	3280
		Actual hours per sprint	144	192	200	176	160	160	144	104	104	128	112	144	120	80	176	64	96	160	88	88	80	80	16	96	160	136	72
																(2 months )
			Sprint 1	Sprint 2	Sprint 3	Sprint 4	Sprint 5	Sprint 6	Sprint 7	Sprint 8	Sprint 9	Sprint 10	Sprint 11	Sprint 12	Sprint 13	Sprint 14	Sprint 15	Sprint 16	Sprint 17	Sprint 18	Sprint 19	Sprint 20	Sprint 21	Sprint 22	Sprint 23	Sprint 24	Sprint 25	Sprint 26	Sprint 27
Reading in JSON configuration files (Create configuration module)	Create configuration module		6
Reading in standardized spatially and temporally distributed climate input data (Create data handling module)	Create climate forcing and static data handling module		1
Run the calibrated WaterGAP with different climate change scenarios as input	Update configuration module to run different climate change scenarios as input		1
Implementation of a new PET algorithm (Flexible algorithm)	Implement PET algorithm		136	40
Implement net radiation	Implement net radiation algorithm			1
Implement canopy storage and fluxes	Implement canopy algorithm			20
Implement snow storage and fluxes	Implement snow algorithm			131		72	24
Implement soil storage and fluxes	Implement soil algorithm				200
Write unit test for ReWaterGAP (vertical water balance functions and lateral waterbalance**)	Unit testing					72
Check code and correct errors (bugs, code format, variable names, units)	Code quality check ( (bugs, code format, variable names, units)					32
Implement response form code reviews	Peer code review						8
Read through ISIMIP quality control tool as a benchmark for the spatial testing tool	Read through ISIMIP quality control tool as a benchmark for the spatial testing tool						96
Improve parallelization scheme (on snow module) by allowing user to select chunk size	Improve runtime of snow module algorithm						24
Saving NETCDF outputs in chunks for very large runs (eg. 100 years)	NetCDF output chunking for large runs						8
Implement ground water storage and fluxes	Implement groundwater algorithm							160
Implement local lakes and wetlands water storage and fluxes	Implement local lakes and wetlands algorithm								144	104
Implement global lakes and wetlands and river water balance including storage and fluxes	Implement global lakes and wetlands and river algorithm										104	128	96
Restart from any daily snapshot or prescribed state	Develop a daily snapshot restart feature												16
ReWaterGAP and ISIMIP QA tool integration (hackfest)	ReWaterGAP-ISIMIP QA tool integration													24
Actual and potential net abstractions from surface water and groundwater	Implement surface and ground water abstraction algorithm													120	120	80	176	64	96	160
Optimize runtime of WaterGAP	Improve ReWaterGAP runtime																				88
Neighbouring cell water supply algorithm assessment (Wateruse Balance ) & Runtime analysis	Water use balance assessment																					88	16	8	8
Water Balance	Global water balance assesement																							72	8
Calibration scheme	Implement Calibration scheme																						64			96	160	136	72
		Sprint	No. of user stories completed	No. of user stories planned	Total working hours	no. of working days	sprint	Remaining user stories	Remaining working hours						vertical	872
		1	3	4	144	18	0	24	3280						lateral	1800	netabs	816
		2	3	4	192	24	1	21	3136						calibration	608
		3	1	1	200	25	2	18	2944							3280
		4	2	3	176	22	3	17	2744
		5	5	5	160	20	4	15	2568
		6	1	1	160	20	5	10	2408
		7	0	1	144	18	6	9	2248
		8	1	1	104	13	7	9	2104
		9	0	1	104	13	8	8	2000
		10	0	1	128	16	9	8	1896
		11	2	2	112	14	10	8	1768
		12	1	2	144	18	11	6	1656
		13	0	1	120	15	12	5	1512
		14	0	1	80	10	13	5	1392
		15	0	1	176	22	14	5	1312
		16	0	1	64	8	15	5	1136
		17	0	1	96	12	16	5	1072
		18	1	1	160	20	17	5	976
		19	1	1	88	11	18	4	816
		20	0	1	88	11	19	3	728
		21	0	2	80	10	20	3	640
		22	0	2	80	10	21	3	560
		23	2	2	16	2	22	3	480
		24	0	1	96	12	23	1	464
		25	0	1	160	20	24	1	368
		26	0	1	136	17	25	1	208
		27	1	1	72	9	26	1	72
							27	0	0
