# Supplementary material for: The process and value of reprogramming a legacy global hydrological model
Source: Copernicus journal article supplement (doi:10.5194/gmd-18-5635-2025), 2025-09-04
Supplement: Supplementary file 2 [file gmd-18-5635-2025-supplement.zip]

## Best Practices On Reprogramming A Legacy Global Water Model

DM06

In just 15 minutes, you can contribute valuable feedback to improve our research software WaterGAP. **Research software is defined as software that encompasses various elements such as source code files, algorithms, computational workflows, and executables developed during the research process or for a research objective.**

### Background:

The global hydrological model, WaterGAP, has been in development for over 25 years, created primarily by PhDs and Postdocs with limited software development experience. Recognizing the challenges posed by poor code quality, we've undertaken a reprogramming initiative to improve readability, modifiability, reusability, and maintainability.

### Study Focus:

This survey which aims at unlocking **user perspectives on a reprogrammed model** is a crucial component of the study "Best Practices on Reprogramming a Legacy Global Water Model". Our study aims to share real-case experiences in the reprogramming process, providing insights from inception to the final code.

### Your Role:

We're keen to hear your perspectives on the reprogrammed model, focusing on readability, modification, and potential contributions to model development. Your feedback will greatly contribute to the long-term research software sustainability.

Note: **sustainability here is defined as the process of developing and maintaining software that continues to meet its purpose over time**

Participation is anonymous, voluntary, and you can stop anytime. The results will be anonymized and published in the peer-reviewed journal Geoscientific Model Development.

Best wishes,  
Emmanuel Nyenah, Petra Döll, and Robert Reinecke

**1. What phase of your career are you currently in?**DM01 

- ☐ Student (undergraduate, Bachelor/Master or similar)
- ☐ Scientific staff
- ☐ PhD (candidate / student)
- ☐ Postdoc
- ☐ Group leader / junior professor
- ☐ Associate professor
- ☐ Full professor
- ☐ Other (scientific)
- ☐ Other (non-scientific)

**2. How long have you been working in your research field?**DM02 

- ☐ Less than 1 year
- ☐ 1-5 years
- ☐ 6-10 years
- ☐ 11-15 years
- ☐ 16+ years

**3. To which field within the geosciences does your research mainly belong?**DM03 

Please select one or more options.

- ☐ Hydrology
- ☐ Climate Science
- ☐ Geophysics
- ☐ Environmental Science
- ☐ Water Quality
- ☐ Ecology
- ☐ Soil Science
- ☐ Geomorphology
- ☐ Earth System Sciences
- ☐ Other (please specify)

US07 

**4. Do you have any background in Hydrology ?**

- ☐ None
- ☐ Novice
- ☐ Intermediate
- ☐ Advanced

**5. What is the focus of your research**DM05 

Select option that describes your typical daily work routine.

- ☐ I use existing computational models (e. g. run with desired input data) for research without developing them myself
- ☐ I develop and use computational models for my research
- ☐ I improve our understanding of processes by conducting experiments in the field or lab.
- ☐ I develop computational models but do not conduct any research.
- ☐ I use existing results of computational models for my research
- ☐ Other (please specify)

**6. What geographic scale are you working on?**DM04 

- ☐ Global
- ☐ Continental
- ☐ < Million km<sup>2</sup>
- ☐ < 1000 km<sup>2</sup>
- ☐ < km<sup>2</sup>
- ☐ < m<sup>2</sup>
- ☐ < cm<sup>2</sup>
- ☐ Mixed

- 
- ☐ Does not apply to me

US10

In the following, we kindly ask you to keep in mind that **research software** includes source code files, algorithms, computational workflows, and executables developed during the research process or for a research objective.

**Plotting scripts are not research software.**

**7. How often do you use research software?**

US01

This involves reading software documentation and installing and running the software.

- ☐ Every day
  - ☐ Multiple times per week
  - ☐ Once a week
  - ☐ Once a month
  - ☐ Less than once a month
- 
- ☐ I do not use research software in my own research.

**8. Do you own a research software?**

US04

- ☐ Yes, I own the research software
  - ☐ No, my supervisor owns the research software
  - ☐ No, the research software belongs to the institution I work for
- 
- ☐ Does not apply to me

**9. How often do you develop code for research software in your research practice?**

US03

This involves adding and/or modifying code in the source code of research software.

Note: This could be your own research software or research software developed by someone else

- ☐ Every day
  - ☐ Multiple times per week
  - ☐ Once a week
  - ☐ Once a month
  - ☐ Less than once a month
- 
- ☐ I used to develop research software in the past but not anymore.
- ☐ Does not apply to me

**10. How many years of programming experience do you have?**

US05

US06

**11. What kind of programming languages do you use?**

Please select one or more options.

- ☐ Python
  - ☐ R
  - ☐ MATLAB
  - ☐ Fortran
  - ☐ C++
  - ☐ Other (please specify)
- 
- ☐ None

**12. How did you learn to program software?**US08 

Please select one or more options.

- ☐ Computer Science degree
  - ☐ Courses during undergraduate studies (e.g., BA / Bsc)
  - ☐ Courses during postgraduate studies (e.g., MA / MSc / PhD)
  - ☐ Workshops
  - ☐ Online-courses
  - ☐ Self-taught /autodidact
- 
- ☐ I do not know how to program

**13. Do you practice any of the following methods / concepts as part of your scientific programming routine?**US09 

Please select one or more options

- ☐ Object-oriented programming
  - ☐ Test-driven development
  - ☐ The use of software architecture and software design patterns (such as Model-Controller-View (MVC), Abstract factory, Decorator or similar)
  - ☐ Other (please specify)
- 
- ☐ Does not apply to me

This section explores the research software called **WaterGAP**. It is a **global hydrological model** that has been active since 1996. WaterGAP quantifies human use of groundwater and surface water, as well as water flows, storage, and overall water resources across all land areas on Earth. This model has been instrumental in assessing water resources and water stress levels both historically and in future scenarios, particularly in the context of climate change. Its contribution extends to enhancing our understanding of variations in continental water storage, with a focus on overexploitation and depletion of water resources.

UP06

The following are questions on the source code of WaterGAP which will potentially help us improve source code readability, modification, and ease of use in addition to getting potential contributions to model development.

**14. Can you identify what equation is used in the code snippet below?**

UP02

Please select the right answer.

The image below shows a function which computes:

- ☐ potential evapotranspiration according to Hargreaves for land and surface water bodies.
  - ☐ potential evapotranspiration according to Priestley-Taylor for land and surface water bodies.
  - ☐ actual evapotranspiration for land and surface water bodies.
  - ☐ actual evapotranspiration according to Penman-Monteith for land and surface water bodies.
  - ☐ Other (please specify)
- 
- ☐ The function is too complex to understand
  - ☐ I dont know what a function in programming is

```

124 @njit(cache=True)
125 def priestley_taylor(temperature, pt_coeff_humid_arid,
126                     net_radiation, openwater_net_radiation,
127                     x, y ):
128     """
129     Compute Priestly-Taylor potential evapotranspiration.
130
131     Parameters
132     -----
133     temperature : float
134         Daily air tempeature, Units : [K]
135     pt_coeff_humid_arid : flaot
136         Priestley-Taylor coefficient for humid and arid cells (alpha), Units: [-]
137     net_radiation : float
138         Net radiation according to Müller Schmied et al., 2016., Units: [Wm-2]
139     openwater_net_radiation : float
140         Open water radiation according to Müller Schmied et al., 2016.,
141         Units: [Wm-2]
142     x : int
143         Latitude index of cell
144     y : int
145         Longitude index of cell
146
147     Returns
148     -----
149     potential_evap : float
150         Potential evapotranspiration, Units: [mm/day]
151     openwater_pot_evap : float
152         Open water potential evapotranspiration, Units: [mm/day]
153
154     """
155     # Index (x, y) to print out varibales of interest
156     # e.g. if x==65 and y==137: print(net_radiation)
157     # =====
158     # Slope of the saturation kPa°C-1
159     # =====
160     # Converting temperature to degrees celcius
161     covert_to_degree = 273.15
162     conv_temperature = temperature - covert_to_degree
163
164     # Actual name: Slope of the saturation, Units: kPa°C-1
165     slope_of_sat_num = 4098 * (0.6108 * np.exp((17.27 * conv_temperature) /
166                                             (conv_temperature + 237.3)))
167
168     slope_of_sat_den = (conv_temperature + 237.3)**2
169
170     slope_of_sat = slope_of_sat_num / slope_of_sat_den
171

```

```

172 # =====
173 # Psychrometric constant kPa°C-1
174 # =====
175 # Actual name: Atmospheric pressure, Units: kPa
176 atm_pressure = 101.3
177
178 # Actual name: Latent heat, Units: MJkg-1
179 latent_heat = np.where(conv_temperature > 0,
180                        (2.501 - (0.002361 * conv_temperature)), 2.835)
181
182 # Actual name: Psychrometric constant Unit kPa°C-1
183 psy_const = (0.0016286 * atm_pressure) / latent_heat
184
185 # =====
186 # Priestley-Taylor Potential evapotranspiration (mm/day)
187 # (Eq. 7 in Müller Schmied et al 2021.)
188 # =====
189 # Priestley-Taylor coefficient for potential evapotranspiration(α)
190 # Following Shuttleworth (1993), α is set to 1.26 in humid
191 # and to 1.74 in (semi)arid cells
192 # Humid-arid classification based on Müller Schmied et al. 2021
193
194 # Converting net radiation to mm/day
195 # Note!!!, I deliberately did not attach "self" here so I dont
196 # convert the final net radiation output to mm/day.
197 net_radiation = (net_radiation * 0.0864) / latent_heat
198
199 # Actual name: Potential evapotranspiration, Units: mmd-1
200 potential_evap = pt_coeff_humid_arid * ((slope_of_sat * net_radiation)
201 / (slope_of_sat + psy_const))
202
203 # Accounting for negative net radiation and setting them to zero
204 potential_evap = np.where(net_radiation <= 0, 0, potential_evap)
205
206 # =====
207 # Priestley-Taylor open water potential evapotranspiration (mm/day)
208 # =====
209 # Converting net radiation to mm/day
210 openwater_net_radiation = \
211     (openwater_net_radiation * 0.0864) / latent_heat
212
213 # Actual name: Open water potential evapotranspiration, Units: mmd-1
214 ▼ openwater_pot_evap = \
215     pt_coeff_humid_arid * ((slope_of_sat * openwater_net_radiation) /
216     (slope_of_sat + psy_const))
217
218 # Accounting for negative net radiation and setting them to zero
219 openwater_pot_evap = np.where(openwater_net_radiation <= 0, 0,
220                               openwater_pot_evap)
221 return potential_evap, openwater_pot_evap

```



**15. Is the additional documentation helpful in understanding the function shown previously?**

The image below shows the theoretical explanation of the function (code snippet) previously shown.

Documentation shown below can be also found on an online interactive web page:

[hydrologyfrankfurt.github.io/ReWaterGAP/api\\_docs/vertical\\_water\\_balance/radiation\\_evapotranspiration.html#radiation-evap](https://hydrologyfrankfurt.github.io/ReWaterGAP/api_docs/vertical_water_balance/radiation_evapotranspiration.html#radiation-evap)

|                                                            | Strongly<br>Agree     | Disagree              | No idea               |
|------------------------------------------------------------|-----------------------|-----------------------|-----------------------|
| The documentation explains the previous functions clearly. | <input type="radio"/> | <input type="radio"/> | <input type="radio"/> |
| I now know the purpose of the previous function.           | <input type="radio"/> | <input type="radio"/> | <input type="radio"/> |
| Documentation is too complex to understand                 | <input type="radio"/> | <input type="radio"/> | <input type="radio"/> |

# Potential Evapotranspiration

`radiation_evapotranspiration.priestley_taylor(temperature, pt_coeff_humid_arid, net_radiation, openwater_net_radiation, x, y)` [\[source\]](#)

Compute Priestly-Taylor potential evapotranspiration.

## Parameters:

**temperature** : *float*

Daily air tempeature, Units : [K]

**pt\_coeff\_humid\_arid** : *float*

Priestley-Taylor coefficient for humid and arid cells (alpha), Units: [-]

**net\_radiation** : *float*

Net radiation according to Müller Schmied et al., 2016., Units: [Wm<sup>-2</sup>]

**openwater\_net\_radiation** : *float*

Open water radiation according to Müller Schmied et al., 2016., Units: [Wm<sup>-2</sup>]

**x** : *int*

Latitude index of cell

**y** : *int*

Longitude index of cell

## Returns:

**potential\_evap** : *float*

Potential evapotranspiration, Units: [mm/day]

**openwater\_pot\_evap** : *float*

Open water potential evapotranspiration, Units: [mm/day]

The potential evapotranspiration  $E_{pot}$  [ $mm/d$ ] is calculated with the **Priestley–Taylor** equation according to Shuttleworth (1993) [4], as:

$$E_{pot} = \alpha \left( \frac{S_a R}{S_a + g} \right)$$

$\alpha$  is set to 1.26 in humid and to 1.74 in (semi)arid cells (see Appendix B in Müller et al. [2]).  $R$  is the net radiation [ $mm/d$ ] that depends on land cover (Table C2, Müller et al. [2]).  $S_a$  is the slope of the saturation vapor pressure–temperature relationship, and  $g$  is the psychrometric constant [ $\frac{kPa}{C}$ ].

#### Note

All grid cells with an aridity index  $AI < 0.75$  are defined as semiarid/arid grid cells. Furthermore, all grid cells north of  $55^\circ N$  are defined as humid grid cells. For further information on this see Müller et al. [2] Appendix B.

## Slope of the saturation and psychrometric constant

$s_a$  is the slope of the saturation vapor pressure–temperature relationship [ $\frac{kPa}{C}$ ] defined as:

$$s_a = \frac{4098(0.6108e^{\frac{17.37T}{T+237.3}})}{(T+237.3)^2}$$

where  $T$  [ $^\circ C$ ] is the daily air temperature.

The the psychrometric constant  $g$  [ $\frac{kPa}{C}$ ] is defined as:

$$g = \frac{0.0016286p_a}{l_h}$$

where  $p_a$  is atmospheric pressure of the standard atmosphere ( $101.3kPa$ ), and  $l_h$  is latent heat [ $\frac{MJ}{kg}$ ]. Latent heat is calculated as:

$$l_h = \begin{cases} 2.501 - 0.002361T, & \text{if } T > 0 \\ 2.501 + 0.334, & \text{otherwise} \end{cases}$$

Questions **16** and **17** relate to the code snippet previously shown (also shown below) and associated documentation on potential evapotranspiration according to Priestley-Taylor.

UP08

**16. How confident are you to change atmospheric pressure constant from 101.3kPa to 101.325kPa in the equation you identified ?**

UP03

Not confident      Slightly confident      Moderately confident      Confident      Very confident      Not sure

**17. Which line of code would you modify ?**

UP07

Write line  
number here

```

124 @njit(cache=True)
125 def priestley_taylor(temperature, pt_coeff_humid_arid,
126                     net_radiation, openwater_net_radiation,
127                     x, y ):
128     """
129     Compute Priestly-Taylor potential evapotranspiration.
130
131     Parameters
132     -----
133     temperature : float
134         Daily air tempeature, Units : [K]
135     pt_coeff_humid_arid : flaot
136         Priestley-Taylor coefficient for humid and arid cells (alpha), Units: [-]
137     net_radiation : float
138         Net radiation according to Müller Schmied et al., 2016., Units: [Wm-2]
139     openwater_net_radiation : float
140         Open water radiation according to Müller Schmied et al., 2016.,
141         Units: [Wm-2]
142     x : int
143         Latitude index of cell
144     y : int
145         Longitude index of cell
146
147     Returns
148     -----
149     potential_evap : float
150         Potential evapotranspiration, Units: [mm/day]
151     openwater_pot_evap : float
152         Open water potential evapotranspiration, Units: [mm/day]
153
154     """
155     # Index (x, y) to print out varibales of interest
156     # e.g. if x==65 and y==137: print(net_radiation)
157     # =====
158     # Slope of the saturation kPa°C-1
159     # =====
160     # Converting temperature to degrees celcius
161     covert_to_degree = 273.15
162     conv_temperature = temperature - covert_to_degree
163
164     # Actual name: Slope of the saturation, Units: kPa°C-1
165     slope_of_sat_num = 4098 * (0.6108 * np.exp((17.27 * conv_temperature) /
166                                         (conv_temperature + 237.3)))
167
168     slope_of_sat_den = (conv_temperature + 237.3)**2
169
170     slope_of_sat = slope_of_sat_num / slope_of_sat_den
171

```

```

172 # =====
173 # Psychrometric constant kPa°C-1
174 # =====
175 # Actual name: Atmospheric pressure, Units: kPa
176 atm_pressure = 101.3
177
178 # Actual name: Latent heat, Units: MJkg-1
179 latent_heat = np.where(conv_temperature > 0,
180                        (2.501 - (0.002361 * conv_temperature)), 2.835)
181
182 # Actual name: Psychrometric constant Unit kPa°C-1
183 psy_const = (0.0016286 * atm_pressure) / latent_heat
184
185 # =====
186 # Priestley-Taylor Potential evapotranspiration (mm/day)
187 # (Eq. 7 in Müller Schmied et al 2021.)
188 # =====
189 # Priestley-Taylor coefficient for potential evapotranspiration(α)
190 # Following Shuttleworth (1993), α is set to 1.26 in humid
191 # and to 1.74 in (semi)arid cells
192 # Humid-arid classification based on Müller Schmied et al. 2021
193
194 # Converting net radiation to mm/day
195 # Note!!!, I deliberately did not attach "self" here so I dont
196 # convert the final net radiation output to mm/day.
197 net_radiation = (net_radiation * 0.0864) / latent_heat
198
199 # Actual name: Potential evapotranspiration, Units: mmd-1
200 potential_evap = pt_coeff_humid_arid * ((slope_of_sat * net_radiation)
201 / (slope_of_sat + psy_const))
202
203 # Accounting for negative net radiation and setting them to zero
204 potential_evap = np.where(net_radiation <= 0, 0, potential_evap)
205
206 # =====
207 # Priestley-Taylor open water potential evapotranspiration (mm/day)
208 # =====
209 # Converting net radiation to mm/day
210 openwater_net_radiation = \
211     (openwater_net_radiation * 0.0864) / latent_heat
212
213 # Actual name: Open water potential evapotranspiration, Units: mmd-1
214 ▼ openwater_pot_evap = \
215     pt_coeff_humid_arid * ((slope_of_sat * openwater_net_radiation) /
216     (slope_of_sat + psy_const))
217
218 # Accounting for negative net radiation and setting them to zero
219 openwater_pot_evap = np.where(openwater_net_radiation <= 0, 0,
220                               openwater_pot_evap)
221 return potential_evap, openwater_pot_evap

```

## Join Our Community

CE02

WaterGAP, freely available on GitHub, encourages collaboration among developers, fostering transparency and broadening participation in source code development. This model source code is developed, hosted and maintained on GitHub [github.com/HydrologyFrankfurt/ReWaterGAP](https://github.com/HydrologyFrankfurt/ReWaterGAP)

Community engagement ensures WaterGAP meets diverse user needs, addressing real-world water challenges. Through our mailing list (will be communited on our Github page), our community enjoys benefits like updates, workshops, and conferences announcements.

Our workshops and conferences will offer practical training sessions aimed at enhancing users' comprehension of the model and enabling them to effectitvely use WaterGAP for their reseach.

## 18. Community Engagement

CE01

How likely is it that you will engage with a user community related to the WaterGAP model (e.g. via mailing list and workshop)

Very Likely
Very Unlikely



○
○
○
○
○

Not sure

○

## 19. What has prohibited you from engaging with other community projects ?

CE04

## Outlook for WaterGAP

CE03

WaterGAP can be run everywhere independent of host institutions (Goethe University Frankfurt and University of Bochum). We hope to provide sustainable research software which not only improves our understanding of the global water cycle but can be integrated with other models (e.g. groundwater or economic models) to drive impactful research.

## 20. What will you suggest to help improve the use, comprehension, and modification of this software to improve its long-term sustainability?

MI01

# Thank you for completing this questionnaire!

We would like to thank you very much for helping us.

Your answers were transmitted, you may close the browser window or tab now.

M.Sc. Emmanuel Nyenah, Goethe University Frankfurt – 2024
