# Supplementary material for: The process and value of reprogramming a legacy global hydrological model
Source: Copernicus journal article supplement (doi:10.5194/gmd-18-5635-2025), 2025-09-04
Supplement: Supplementary file 5 [file gmd-18-5635-2025-supplement.zip]

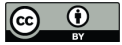

*Supplement of*

## **The process and value of reprogramming a legacy global hydrological model**

**Emmanuel Nyenah et al.**

*Correspondence to:* Emmanuel Nyenah (nyenah@em.uni-frankfurt.de)

- gmd-18-5635-2025-supplement-title-page.pdf
- supplement\_info
  - Supplement\_gmd.pdf
  - progress\_taking.xlsx
  - questionnaire\_response.pdf
  - questionnaire\_user\_survey.pdf
  - software\_requirement\_WaterGAP.pdf

The copyright of individual parts of the supplement might differ from the article licence.
